# Supplementary figures and images for: DFT study of the reaction mechanism of CuO–char in chemical-looping combustion
Source: Royal Society of Chemistry journal article supplement (doi:10.1039/d1se01160j), 2021-01-01

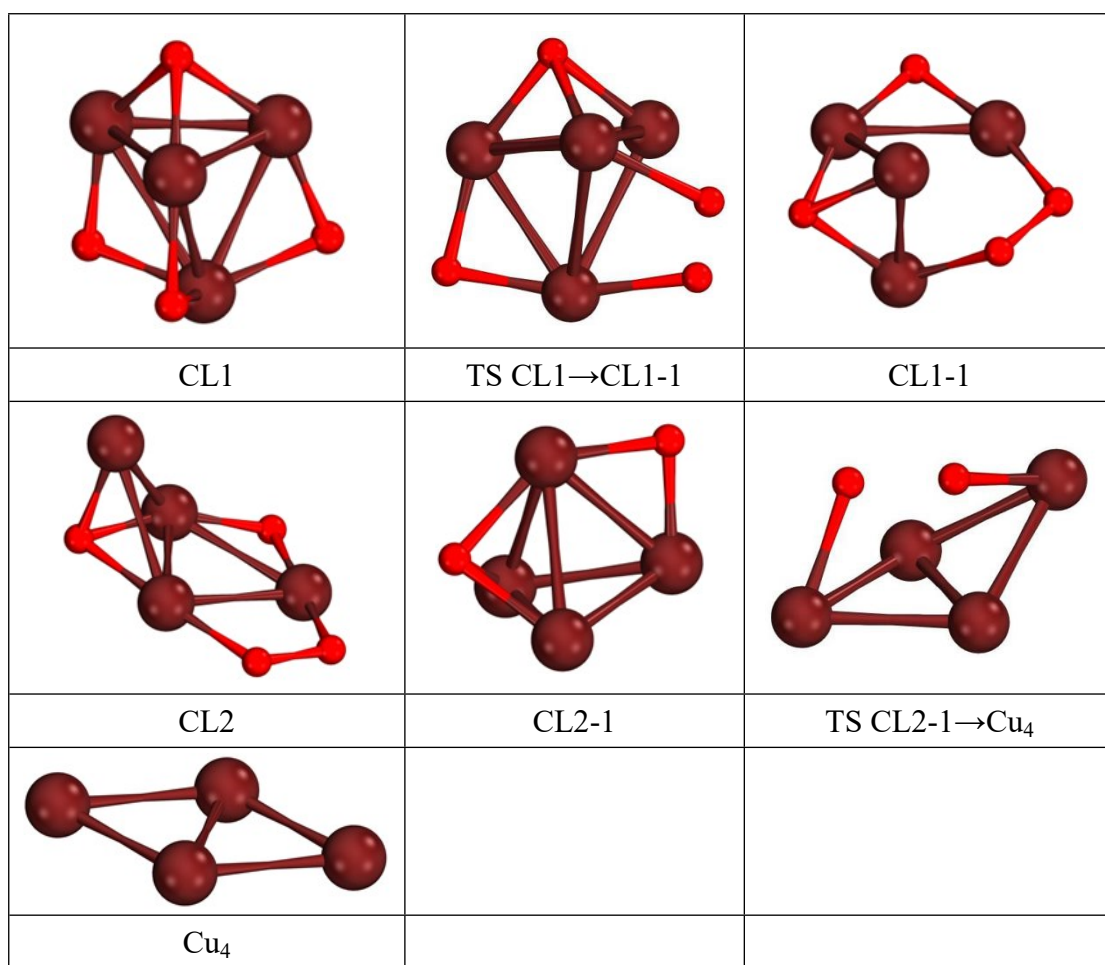

Fig. S1

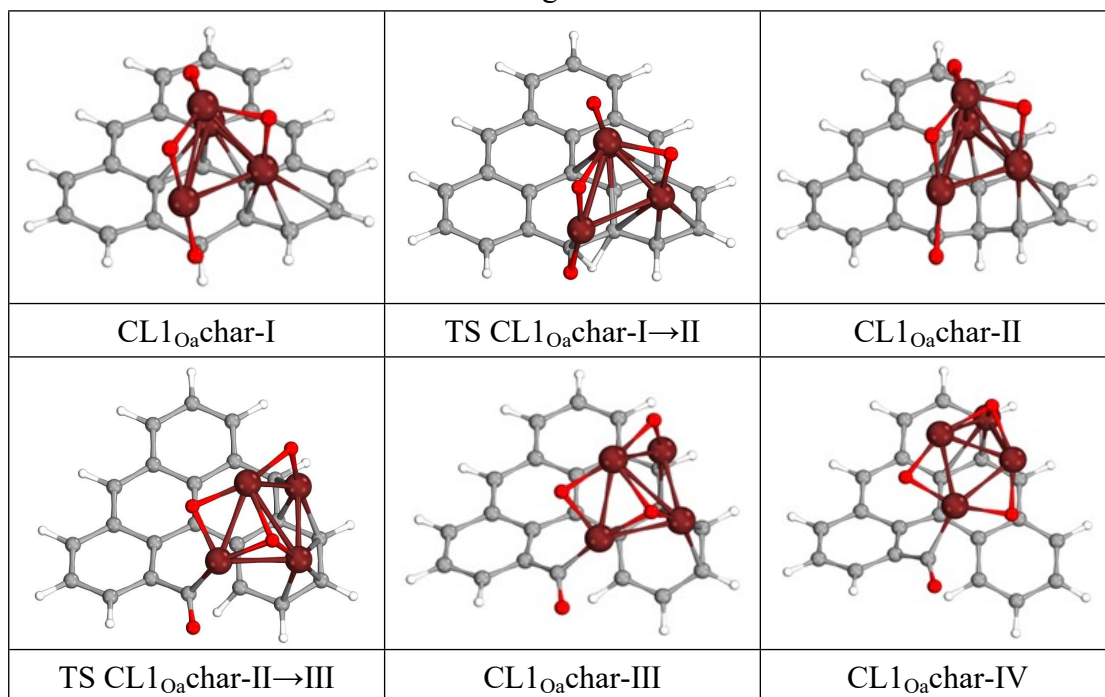

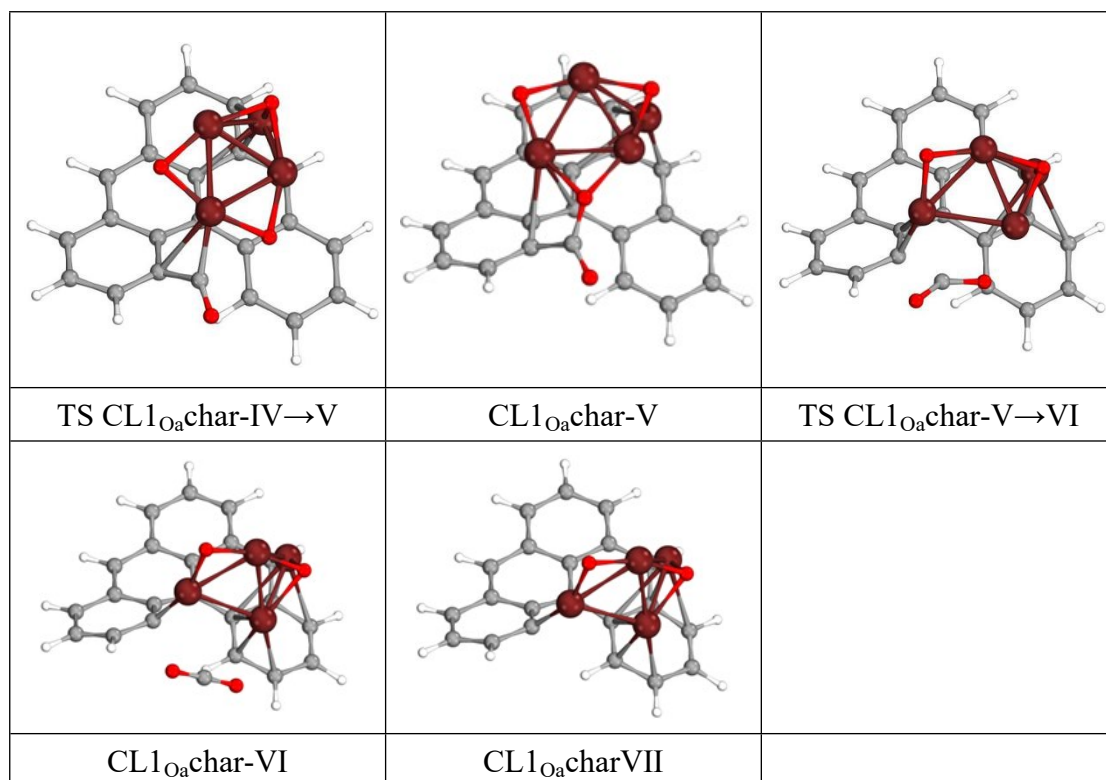

Fig. S2

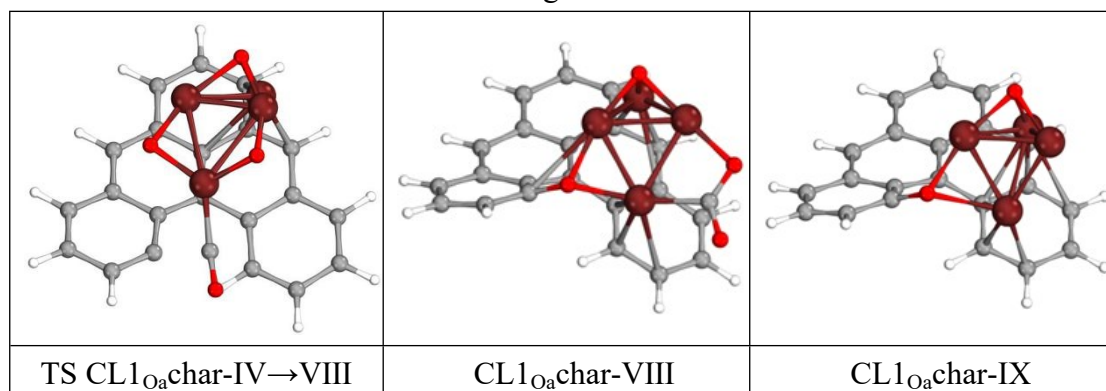

Fig. S3

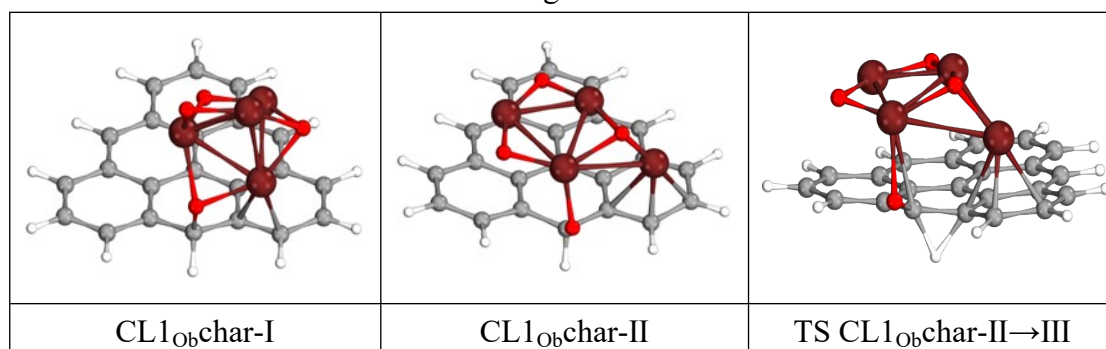

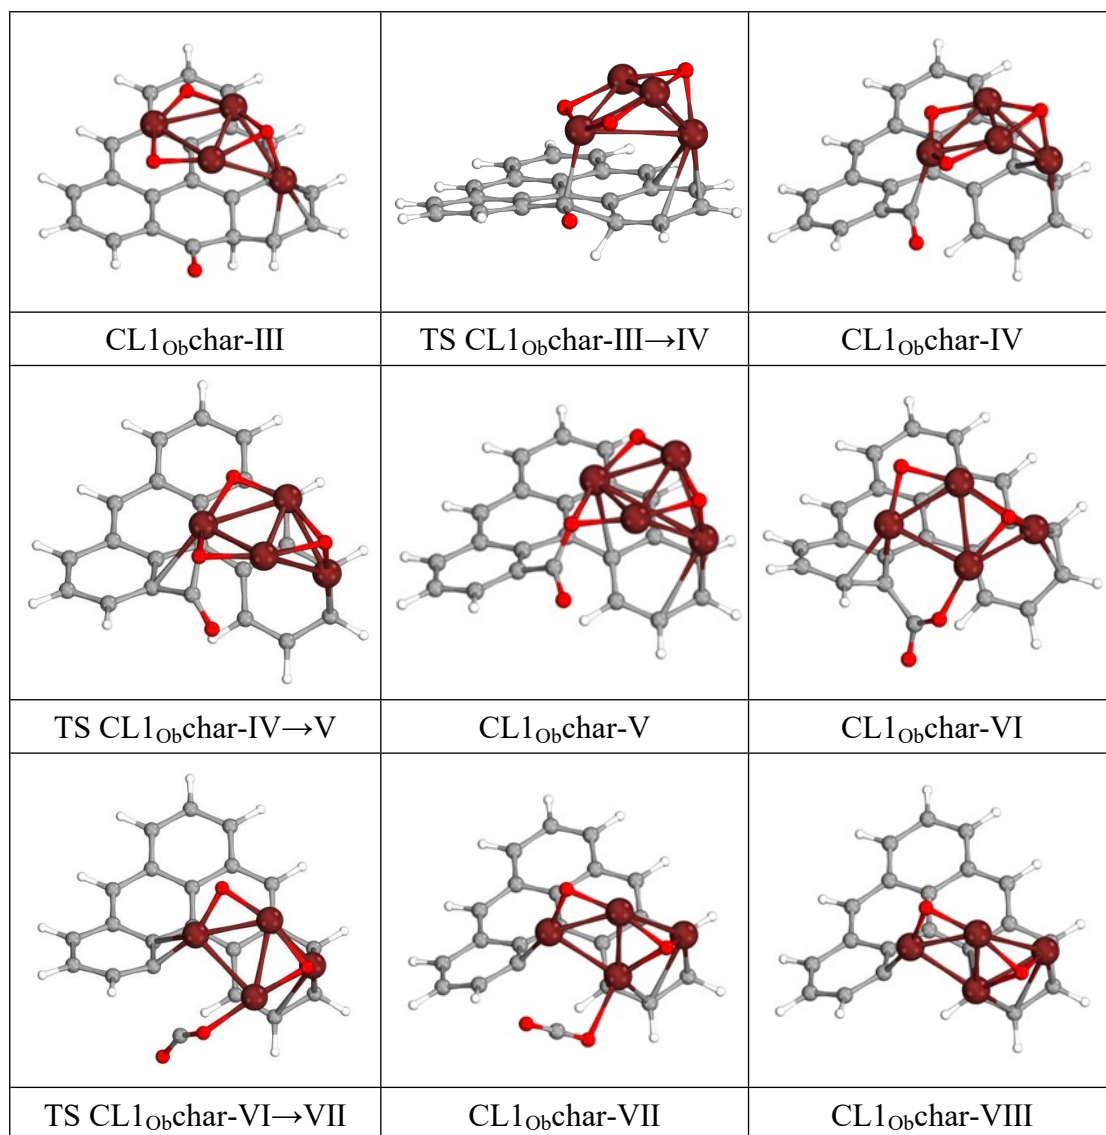

Fig. S4

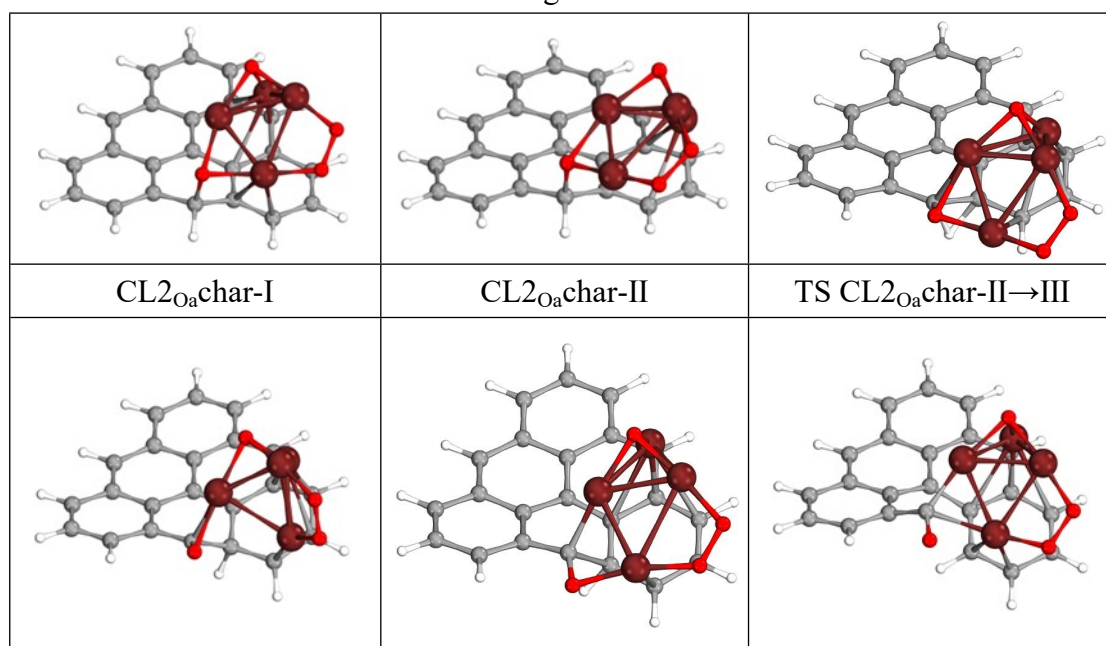

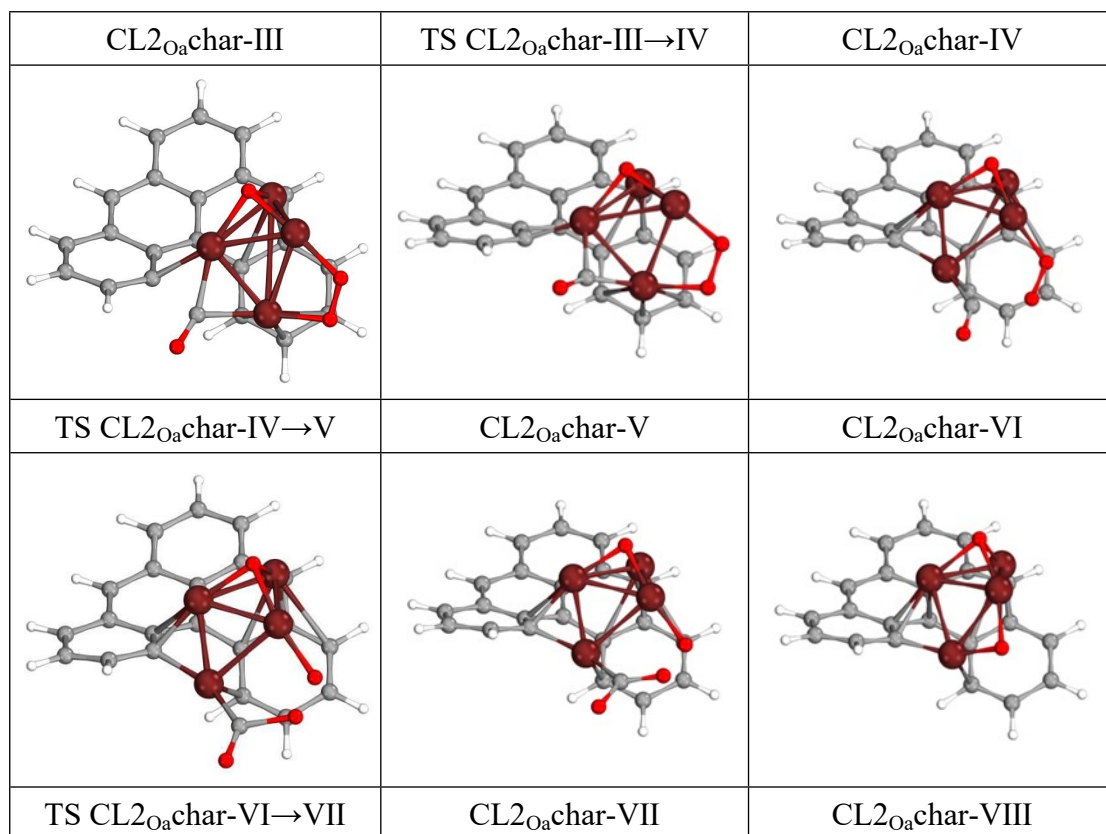

Fig. S5

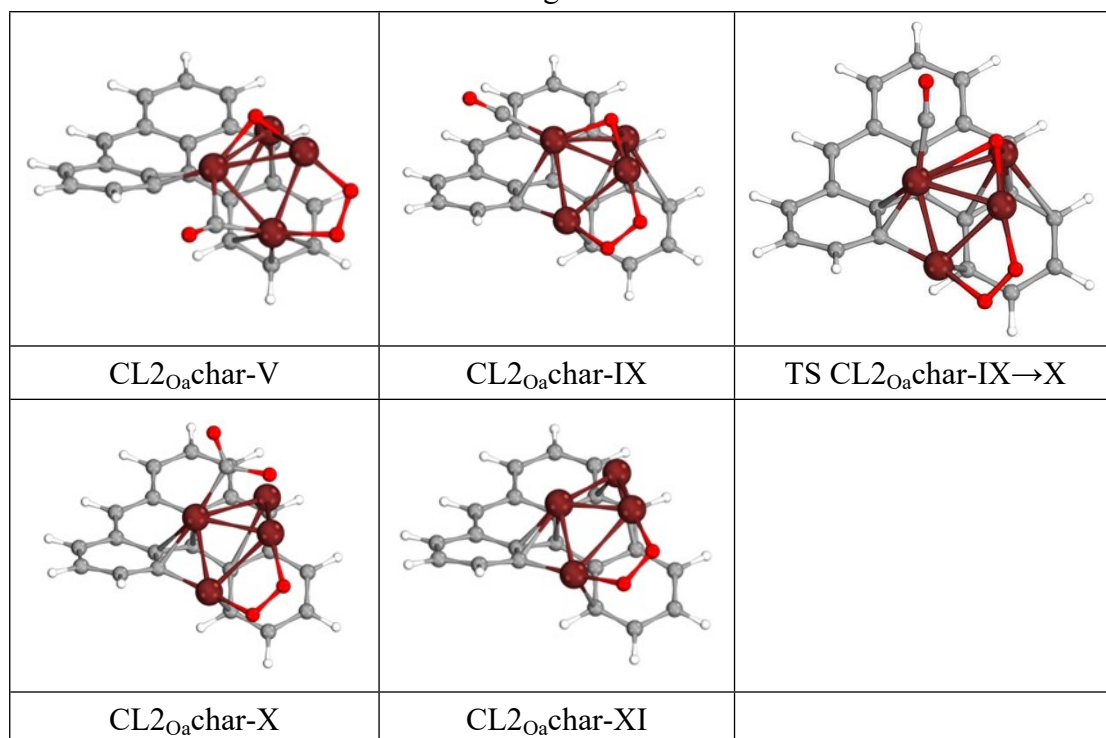

Fig. S6



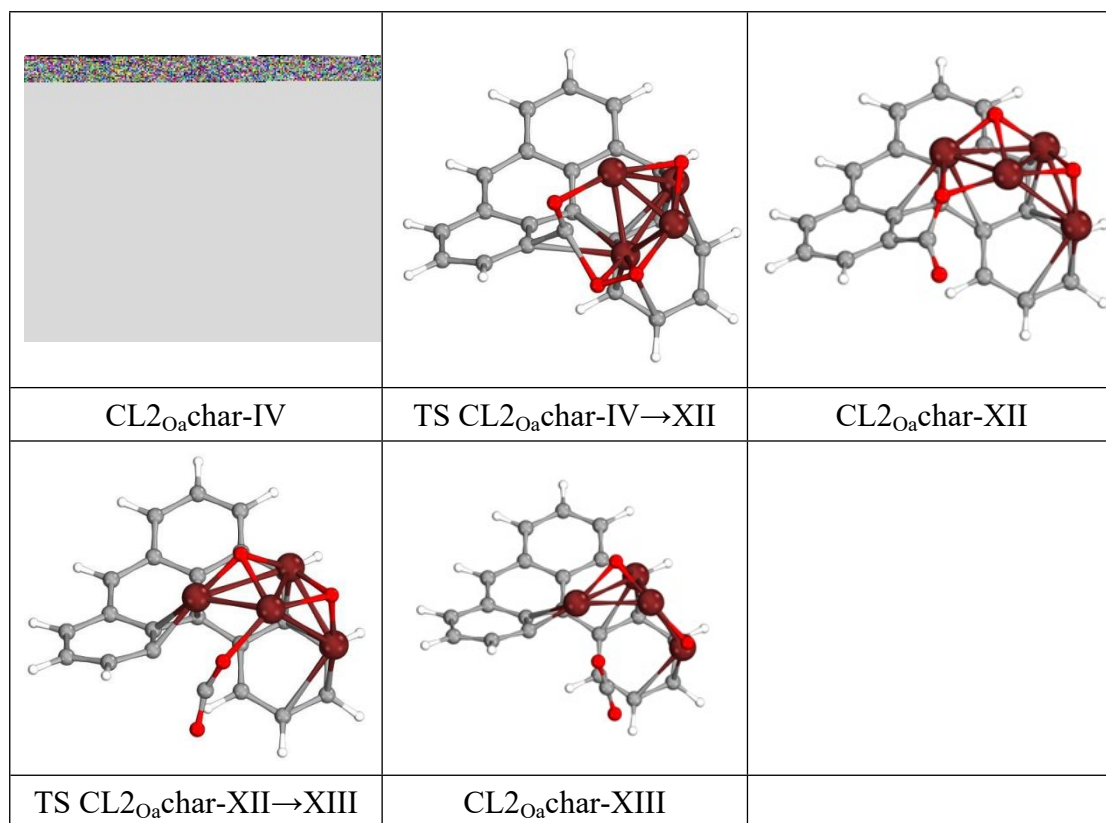

Fig. S7

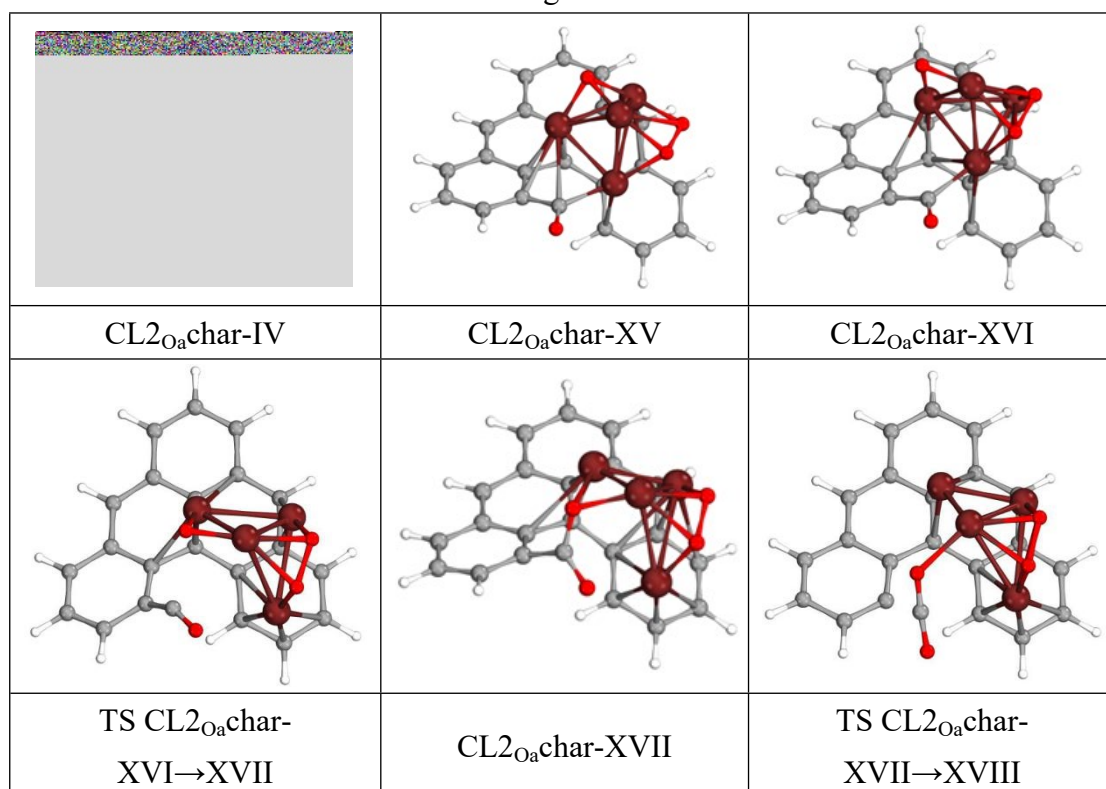

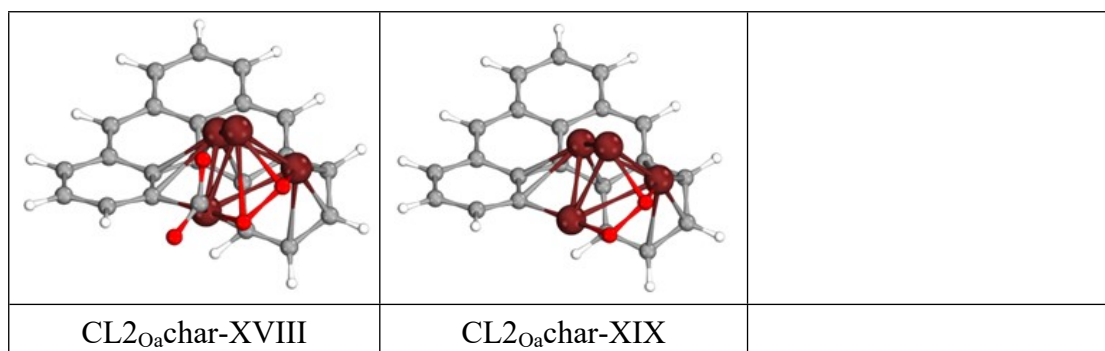

Fig. S8

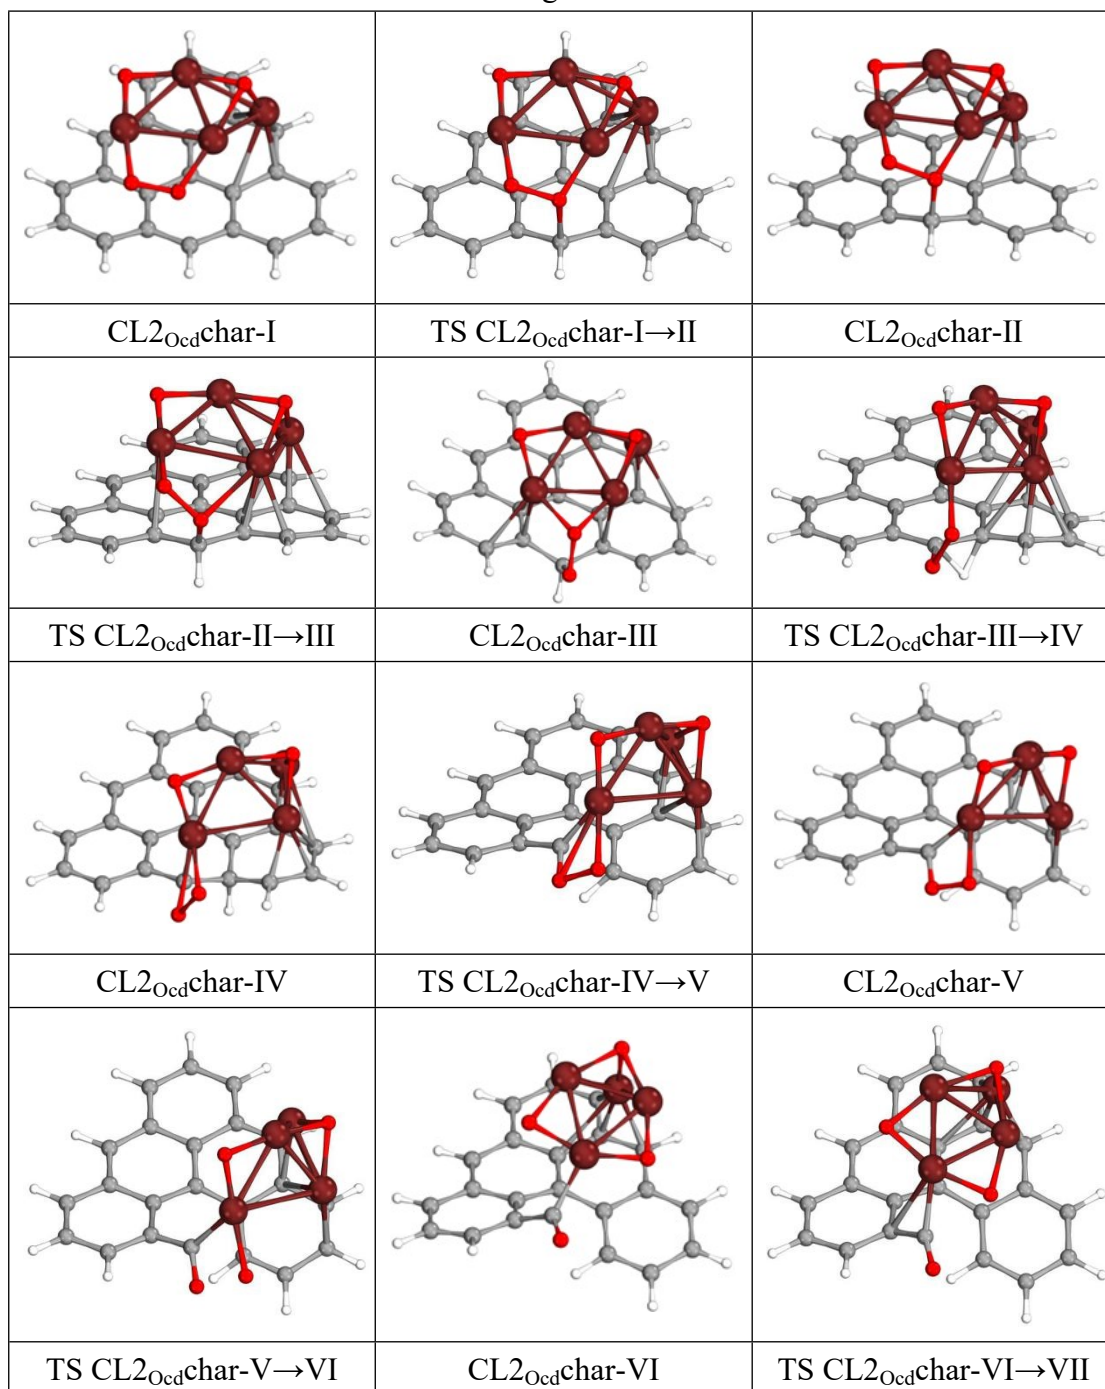

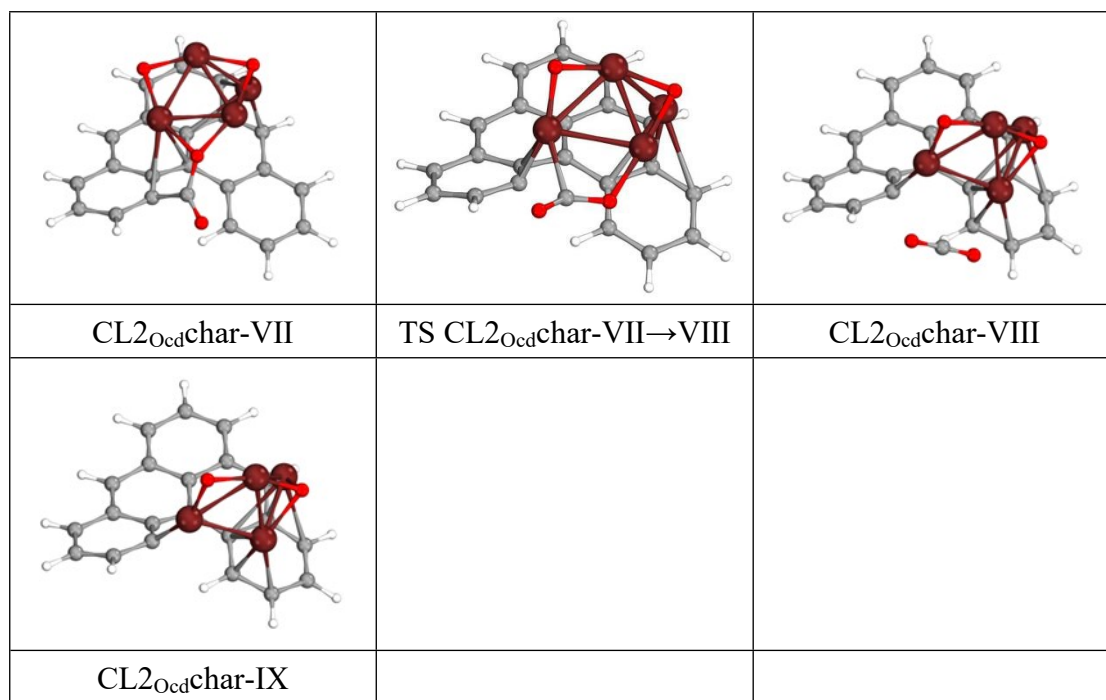

Fig. S9

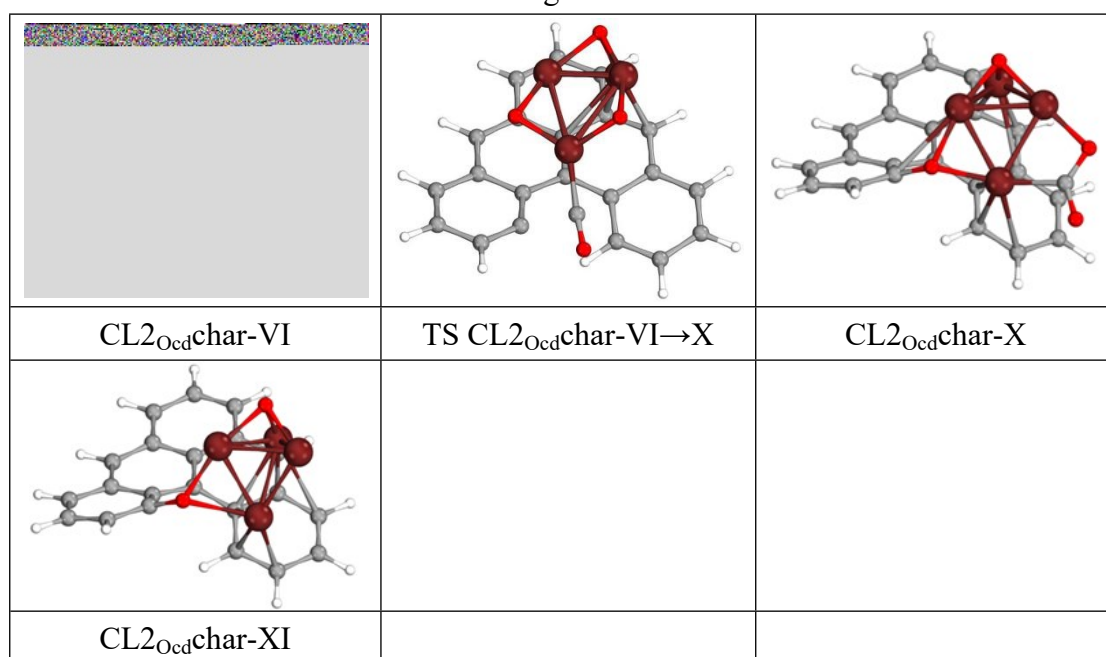

Fig. S10

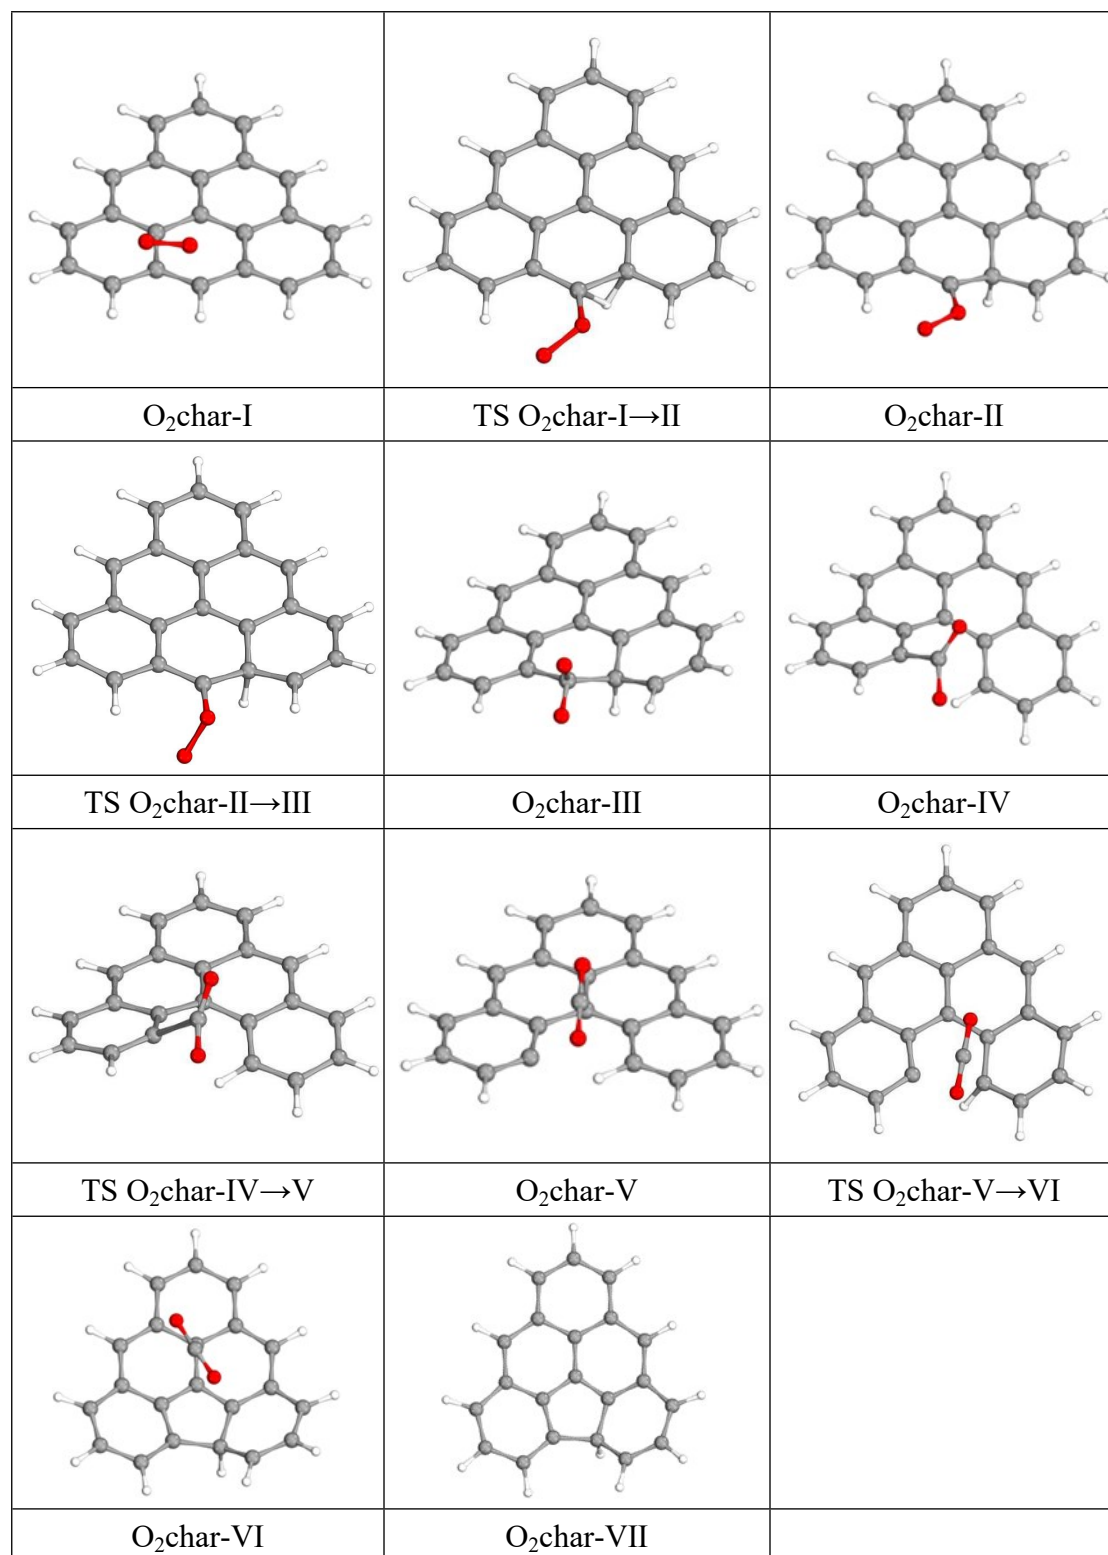

Fig. S11



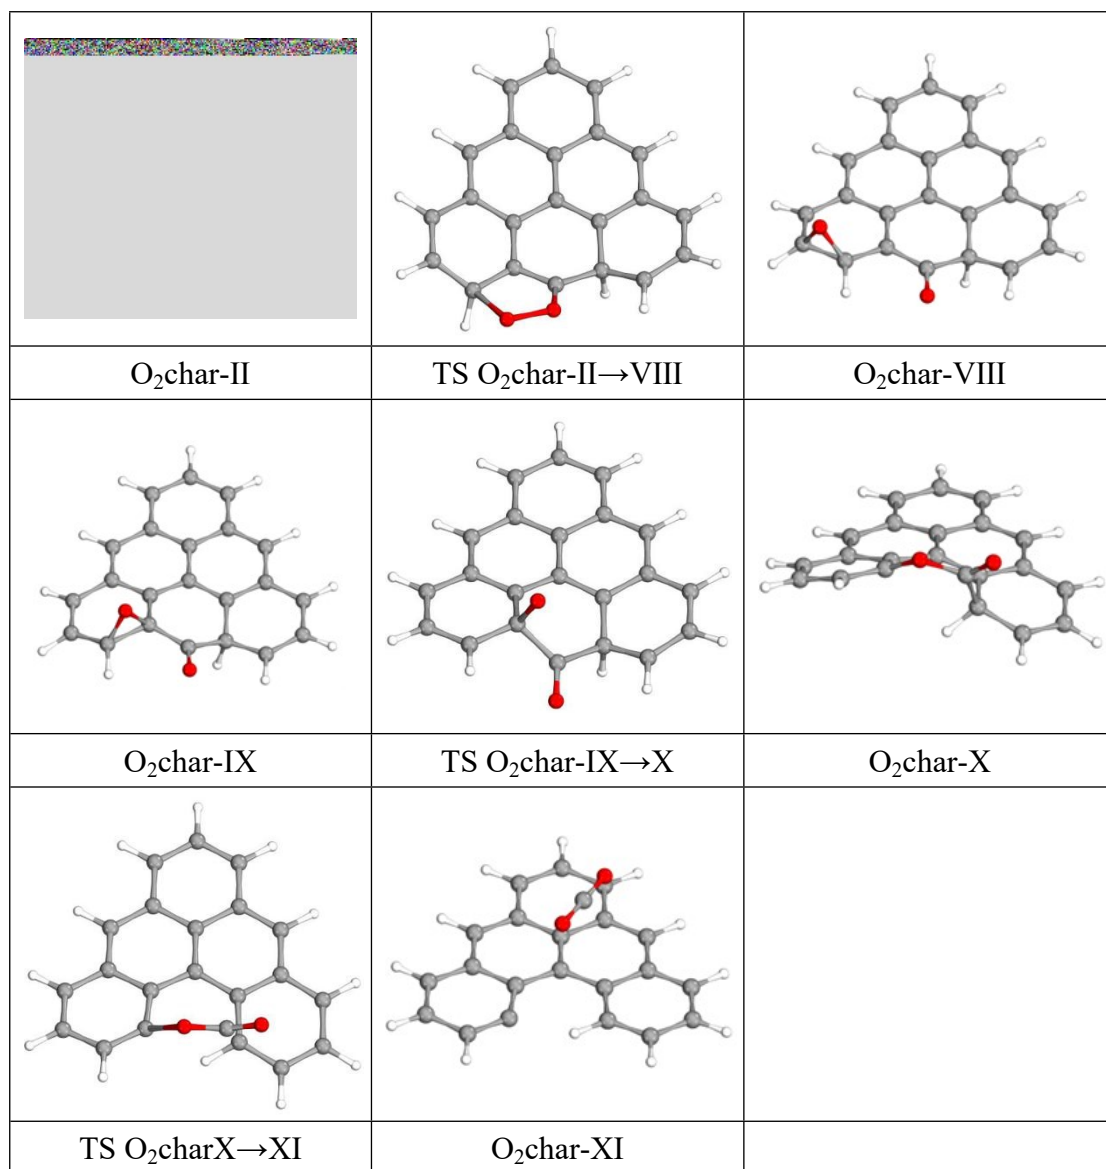

Fig. S12

Supplement: d1se01160j1.pdf [file d1se01160j1.pdf]
